# Supplementary material for: Genome-Scale Metabolic Models and Machine Learning Reveal Genetic Determinants of Antibiotic Resistance in Escherichia coli and Unravel the Underlying Metabolic Adaptation Mechanisms
Source: PubMed Central journal article supplement (PMC8409726; doi:10.1128/msystems.00913-20), 2021-08-03

(a)

### Geographic Distribution of Isolates by Country

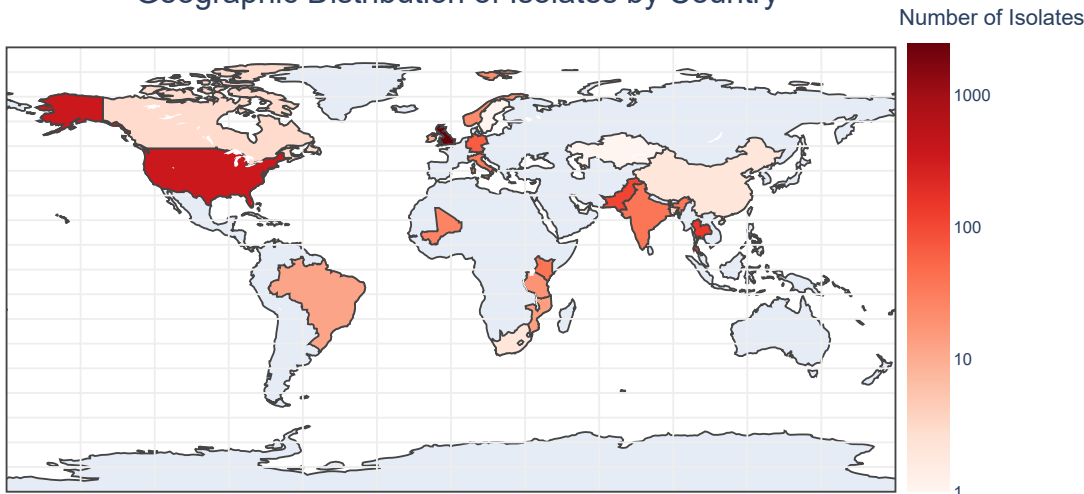

(b)

### Resistant and Susceptible Distribution of Isolates by Antibiotics

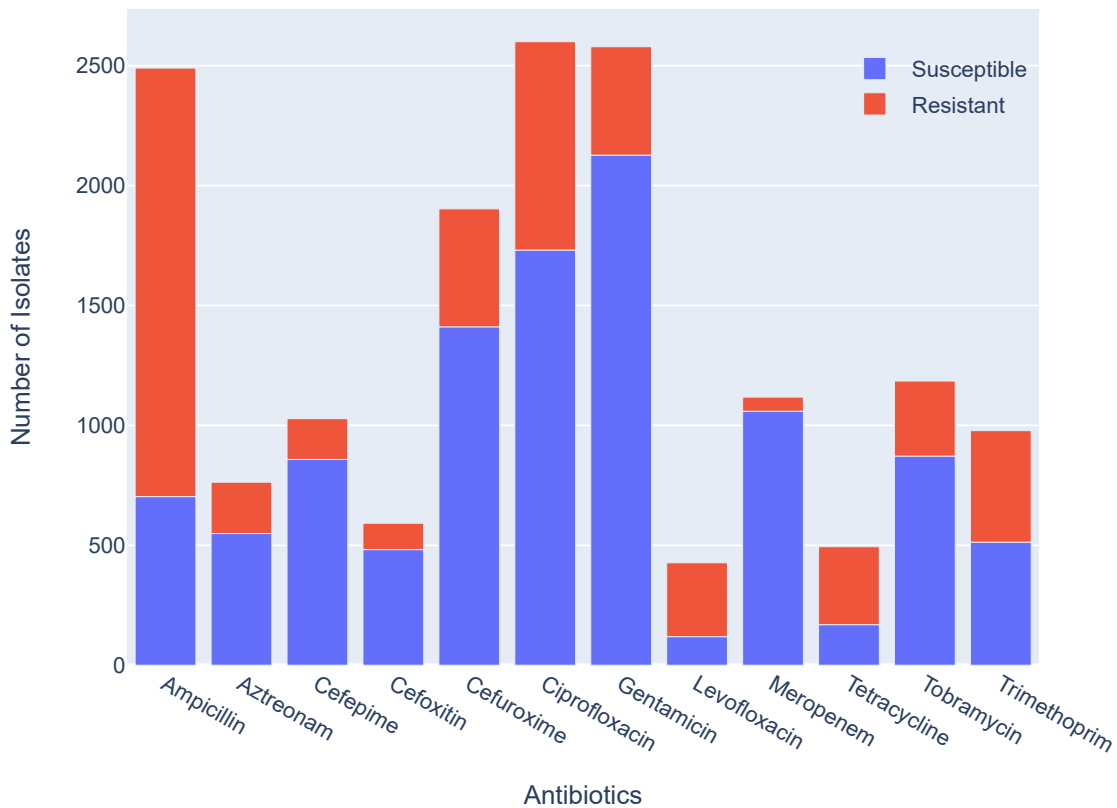

Supplement: msystems.00913-20-sf002.pdf [file msystems.00913-20-sf002.pdf]
