# Supplementary material for: Genome-Scale Metabolic Models and Machine Learning Reveal Genetic Determinants of Antibiotic Resistance in Escherichia coli and Unravel the Underlying Metabolic Adaptation Mechanisms
Source: PubMed Central journal article supplement (PMC8409726; doi:10.1128/msystems.00913-20), 2021-08-03
Supplement: msystems.00913-20-sf003.pdf [file msystems.00913-20-sf003.pdf]

a)

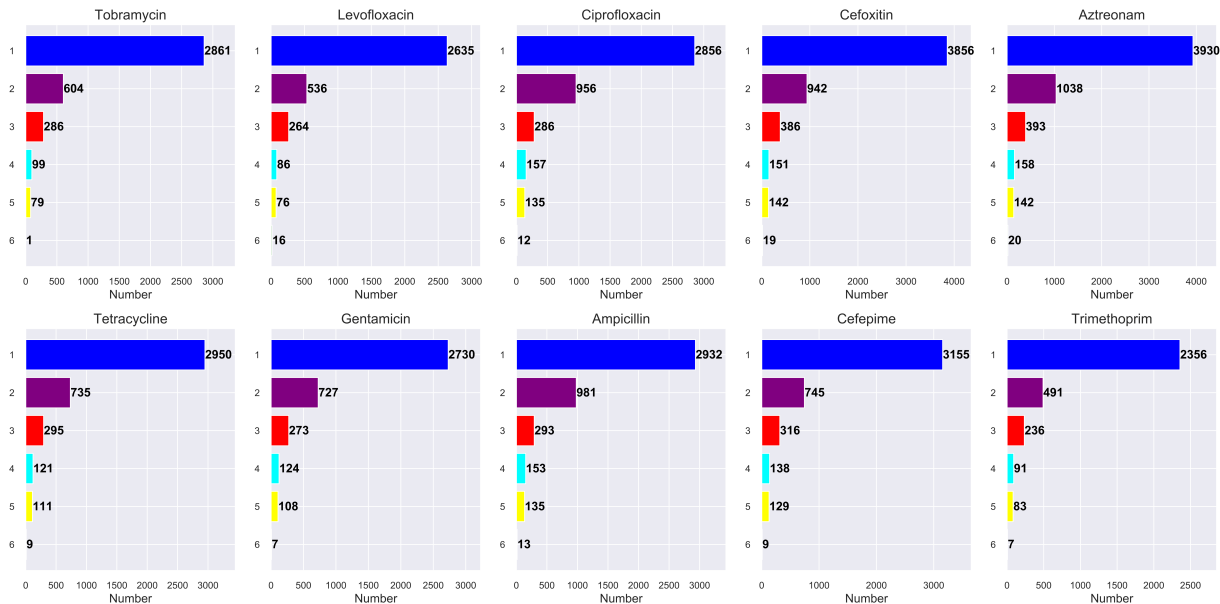

b)

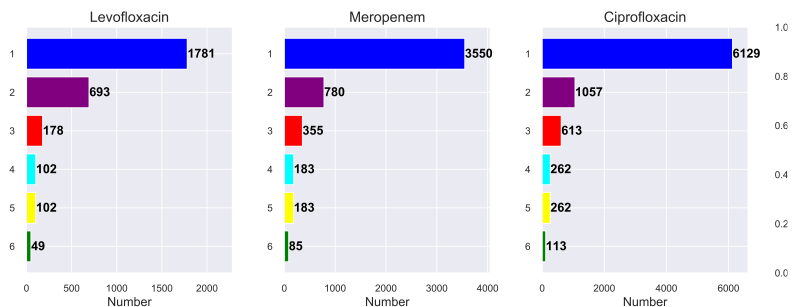

1. Total number of features (k-mer or SNP) in the AMR model
2. Number of unique genes corresponding to the features in the AMR model
3. Number of features in the top 10% of features in the AMR model
4. Number of unique genes corresponding to the top 10% of features in the AMR model
5. Number of genes with functional annotation which correspond to features in the top 10% of features in the AMR model
6. Number of genes in the genome scale model which correspond to features in the top 10% of features in the AMR model
